# Supplementary material
Source: PubMed Central journal article supplement (PMC2897409)
Supplement: supp_76_13_4497__1.pdf [file supp_76_13_4497__1.pdf]

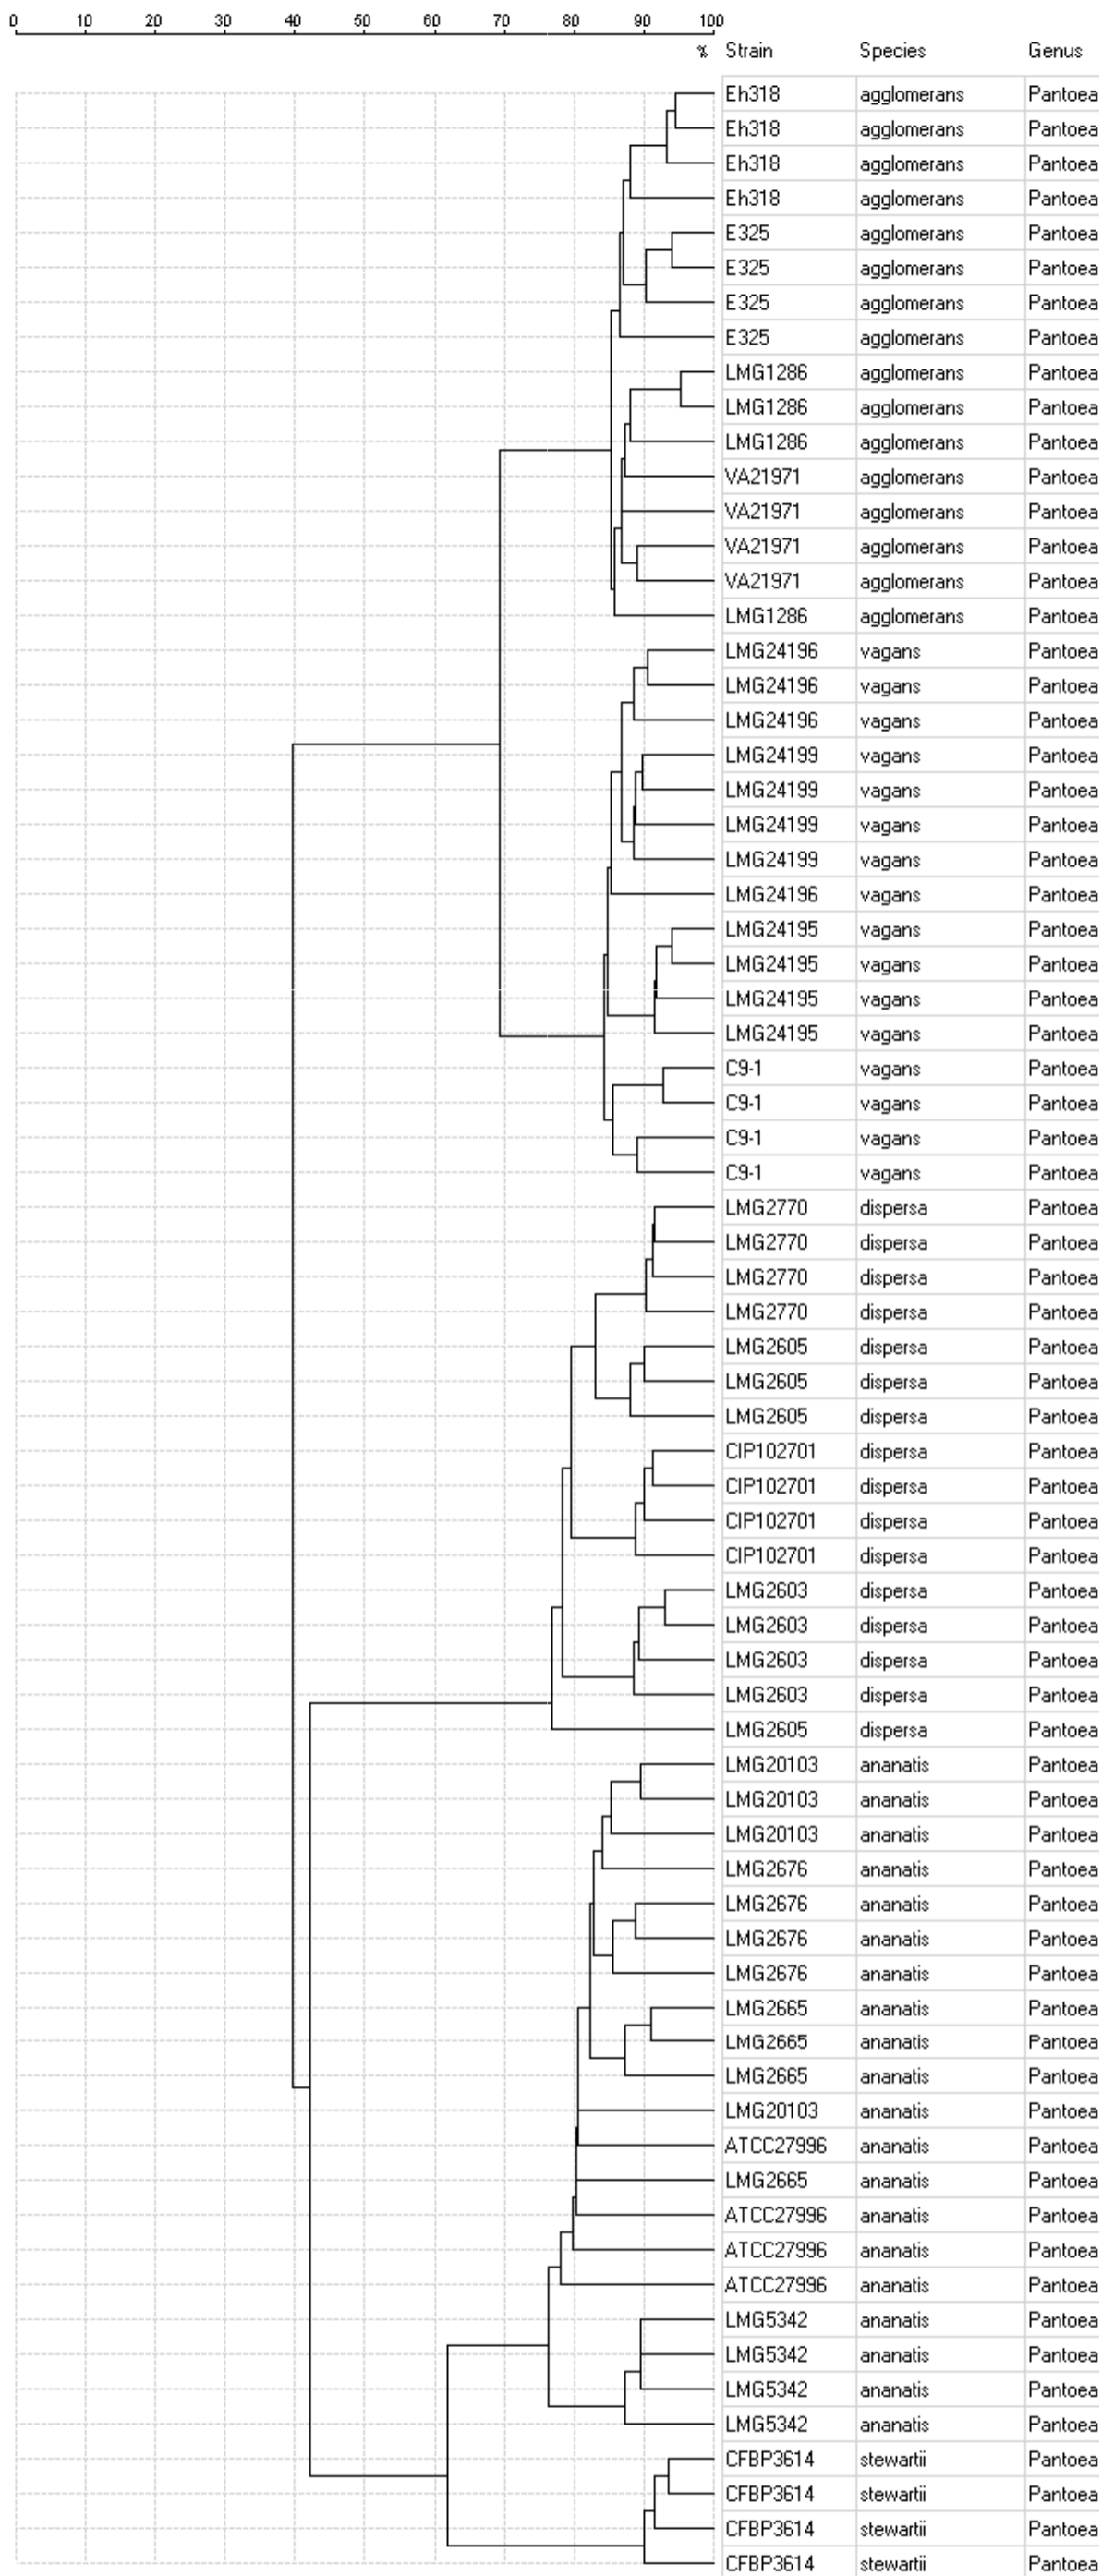

**Filter:**  
 Error (%): 0.08  
 Absolute Intensity >= 200  
 Relative Intensity >= 0  
 Massrange from 3000 to 20000  
 Select Exclusion list:

**FIG. S1.** Reproducibility of MALDI-TOF MS assessed by the analysis of four replicates per strain grown on LB agar. The dendrogram was constructed on the basis of the protein mass fingerprint patterns of all analyzed strains using the single-link clustering algorithm implemented in SARAMIS™.
