# Supplementary material
Source: PubMed Central journal article supplement (PMC2897409)
Supplement: supp_76_13_4497__2.pdf [file supp_76_13_4497__2.pdf]

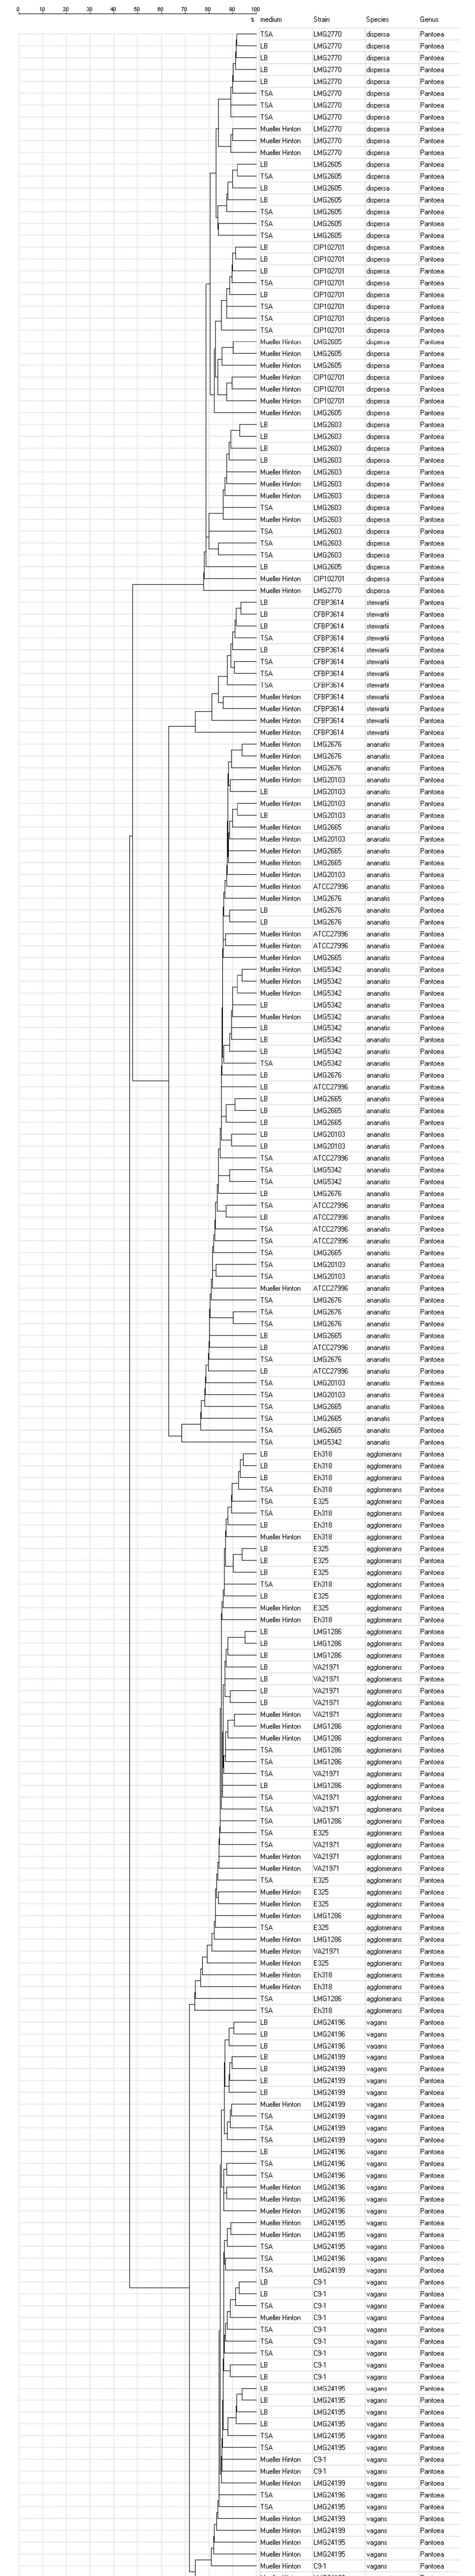

Filter:  
 Error (%): 0.08  
 Absolute Intensity >= 200  
 Relative Intensity >= 0  
 Massrange from 3000 to 20000  
 Select Exclusion list:

**FIG. S2.** Influence of growth medium on the reproducibility of MALDI-TOF MS assessed by the analysis of each four replicates per strain grown on LB agar, TSA and MHA. The dendrogram was constructed on the basis of each single-link fingerprint patterns of all analyzed strains using the single-link clustering algorithm implemented in SARAMIS™.
